# Supplementary material for: A 5Ad Dietary Protocol for Functional Bowel Disorders
Source: MDPI journal article supplement (doi:10.3390/nu11081938), 2019-08-17
Supplement: s1 [file s1]

# Dietary Analysis

27 year old female, 70kg, 1.68m | P\_F 5Ad\_Plan

Average of 7 day log

2nd Nov 2018 - 8th Nov 2018

| NUTRIENT                      | AVG. INTAKE    | TARGET   | LIMITS         | <div>LOWER LIMIT</div> | <div>ACTUAL INTAKE</div> | <div>YOUR TARGET</div> | <div>UPPER LIMIT</div> |
|-------------------------------|----------------|----------|----------------|------------------------|--------------------------|------------------------|------------------------|
| - ENERGY -                    |                |          |                |                        |                          |                        |                        |
| Energy(Kcal)                  | 1876kcal (85%) | 2206kcal |                |                        |                          |                        |                        |
| - MACRONUTRIENTS -            |                |          |                |                        |                          |                        |                        |
| Carbohydrate                  | 207g (75%)     | 276g     |                |                        |                          |                        |                        |
| Protein                       | 76g (144%)     | 53g      |                |                        |                          |                        |                        |
| Fat                           | 84g            |          | <86g           |                        |                          |                        |                        |
| Water                         | 1356g          |          |                | N/A                    |                          |                        |                        |
| › water from drinks           | 0g             |          |                | N/A                    |                          |                        |                        |
| Alcohol                       | 0g             |          | <15.8g         |                        |                          |                        |                        |
| - CARBOHYDRATE -              |                |          |                |                        |                          |                        |                        |
| Starch                        | 98g            |          |                | N/A                    |                          |                        |                        |
| Oligosaccharide               | 0.27g          |          |                | N/A                    |                          |                        |                        |
| Fibre                         | 36.7g (122%)   | 30g      |                |                        |                          |                        |                        |
| NSP                           | 25.9g          |          |                | N/A                    |                          |                        |                        |
| Sugars                        | 108g           |          |                | N/A                    |                          |                        |                        |
| Free Sugars                   | 0g             |          | <27.6g         |                        |                          |                        |                        |
| - LIPID COMPONENTS -          |                |          |                |                        |                          |                        |                        |
| Saturated Fat                 | 16.9g          |          | <27g           |                        |                          |                        |                        |
| › monounsaturated fat         | 34.2g (107%)   | 31.9g    |                |                        |                          |                        |                        |
| Polyunsaturated fat           | 24g            |          | >6.5g <24.5g   |                        |                          |                        |                        |
| › omega3(n-3)                 | 3.2g           |          | >0.49g         |                        |                          |                        |                        |
| › omega6(n-6)                 | 20.8g          |          | >2.5g          |                        |                          |                        |                        |
| Trans-fatty acids             | 0.38g          |          | <4.9g          |                        |                          |                        |                        |
| Cholesterol                   | 177mg          |          |                | N/A                    |                          |                        |                        |
| - MINERALS & TRACE ELEMENTS - |                |          |                |                        |                          |                        |                        |
| Sodium                        | 1320mg (82%)   | 1600mg   | >575mg <2400mg |                        |                          |                        |                        |
| Potassium                     | 5753mg (164%)  | 3500mg   | >2000mg        |                        |                          |                        |                        |
| Chloride                      | 2773mg (110%)  | 2500mg   |                |                        |                          |                        |                        |
| Calcium                       | 730mg (104%)   | 700mg    | >400mg         |                        |                          |                        |                        |
| Phosphorus                    | 1425mg (259%)  | 550mg    |                |                        |                          |                        |                        |
| Magnesium                     | 534mg (197%)   | 270mg    | >150mg         |                        |                          |                        |                        |
| Iron                          | 13.7mg (92%)   | 14.8mg   | >8mg           |                        |                          |                        |                        |

|                                    |               |          |         |                                              |
|------------------------------------|---------------|----------|---------|----------------------------------------------|
| Zinc                               | 9.8mg (139%)  | 7mg      | >4mg    | <div><div></div><div></div><div></div></div> |
| Copper                             | 2.6mg (215%)  | 1.2mg    |         | <div><div></div><div></div><div></div></div> |
| Manganese                          | 5mg           |          | >1.4mg  | <div><div></div><div></div><div></div></div> |
| Selenium                           | 50ug (82%)    | 60ug     | >40ug   | <div><div></div><div></div><div></div></div> |
| Iodine                             | 136ug (96%)   | 140ug    | >70ug   | <div><div></div><div></div><div></div></div> |
| - VITAMINS -                       |               |          |         |                                              |
| Vitamin A (ret eq)                 | 4258ug (709%) | 600ug    | >250ug  | <div><div></div><div></div><div></div></div> |
| Vitamin D                          | 4.1ug (41%)   | 10ug     |         | <div><div></div><div></div><div></div></div> |
| Vitamin E                          | 33.5mg        |          | >3mg    | <div><div></div><div></div><div></div></div> |
| Vitamin K <sub>1</sub>             | 236ug (336%)  | 70ug     |         | <div><div></div><div></div><div></div></div> |
| Thiamin (B <sub>1</sub> )          | 1.5mg (192%)  | 0.8mg    | >0.23mg | <div><div></div><div></div><div></div></div> |
| Riboflavin (B <sub>2</sub> )       | 1.1mg (99%)   | 1.1mg    | >0.8mg  | <div><div></div><div></div><div></div></div> |
| Niacin total (B <sub>3</sub> )     | 30.9mg (212%) | 14.6mg   | >9.7mg  | <div><div></div><div></div><div></div></div> |
| Pantothenic Acid (B <sub>5</sub> ) | 6.1mg (122%)  | 3-7mg    |         | <div><div></div><div></div><div></div></div> |
| Vitamin B <sub>6</sub>             | 1.9mg (165%)  | 1.1mg    | >0.84mg | <div><div></div><div></div><div></div></div> |
| Folates (B <sub>9</sub> ) Total    | 382ug (191%)  | 200ug    | >100ug  | <div><div></div><div></div><div></div></div> |
| Vitamin B <sub>12</sub>            | 4.2ug (281%)  | 1.5ug    | >1ug    | <div><div></div><div></div><div></div></div> |
| Biotin (B <sub>7</sub> )           | 49ug (46%)    | 10-200ug |         | <div><div></div><div></div><div></div></div> |
| Vitamin C                          | 226mg (566%)  | 40mg     | >10mg   | <div><div></div><div></div><div></div></div> |
| - OTHER -                          |               |          |         |                                              |
| GL                                 | 106           |          |         | N/A                                          |
| Caffeine                           | 0mg           |          |         | N/A                                          |

Figures from UK: SACN 2017 / COMA guidelines for female, 25-35 years old

Generated by Nutritics v5.096 on 10th Aug 2019

## Macronutrient Analysis

|                  | CARBOHYDRATE | SUGARS | PROTEIN | FAT   | SATFAT | ALCOHOL |
|------------------|--------------|--------|---------|-------|--------|---------|
| Intake           | 206.9g       | 108.4g | 76g     | 84.2g | 16.9g  | 0g      |
| g/kg body-weight | 3            | 1.5    | 1.1     | 1.2   | 0.2    | 0       |
| Kilocal          | 814          | 434    | 304     | 758   | 153    | 0       |
| Kilocal %        | 43.4%        | 23.1%  | 16.2%   | 40.4% | 8.1%   | 0%      |

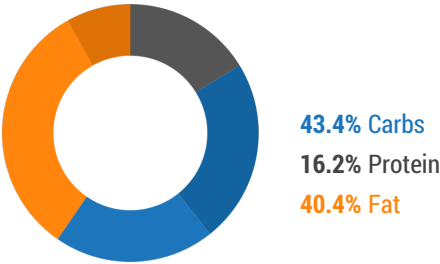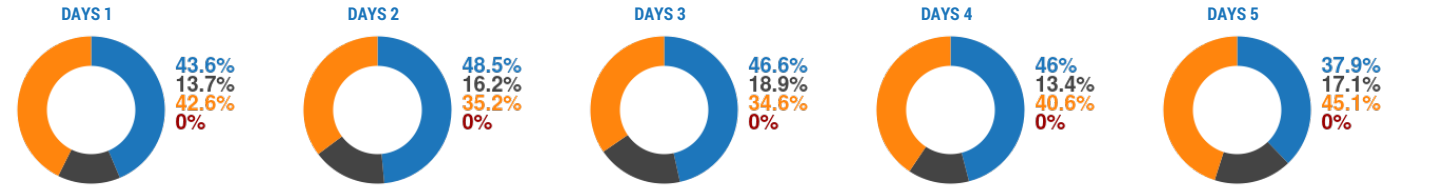

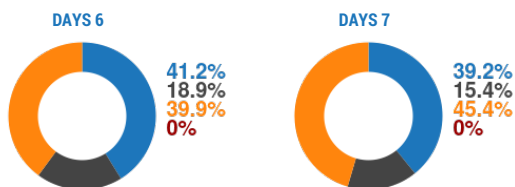

---

## Notes

This report represents the dietary analysis of the average weekly intake of a female who followed the 5Ad Dietary Protocol strictly, with 1.78 m height, and a target weight of 70 kg. The middle vertical reference line represents the DRVs/RNIs as set by the SACN committee, UK (Figures from UK: SACN 2017 / COMA guidelines for female, 25-35 years old).

- All nutrients were compared against their respective DRVs/RNIs and nothing was red-flagged in terms of the sufficiency nor excessive intake.
- The percentages of the macronutrient distribution of the 5Ad Diet is as close as possible to SACN guidelines, (43-16-40) vs (50-15-35) of total energy intake for CHO-Protein-Fat, respectively.
- Fibre is even slightly higher than the recommended but it is still a safe level and all from natural sources (nuts, seeds, fruits, vegetables including tubers).
- There is zero added sugar (zero free sugars, UK terminology).
- The total fat content, even if it is slightly higher, is from all natural sources and poly- and monounsaturated fat are at an optimal level; saturated fat is low and omega 3 and 6 fatty acids meet the requirements.
- The protein intake is within the guidelines and when checked per kg body weight, it is still a safe level.
- All micronutrient requirements are met.
- Vitamin D is a special case and attention has been paid to this in the post-intervention guidance (which is part of the protocol in the long-term), as well as calcium intake.
- Na/K ratio is about ideal; although we recognise that this ratio is still a debatable matter.
