# Supplementary figures and images for: A 5Ad Dietary Protocol for Functional Bowel Disorders
Source: MDPI journal article supplement (doi:10.3390/nu11081938), 2019-08-17

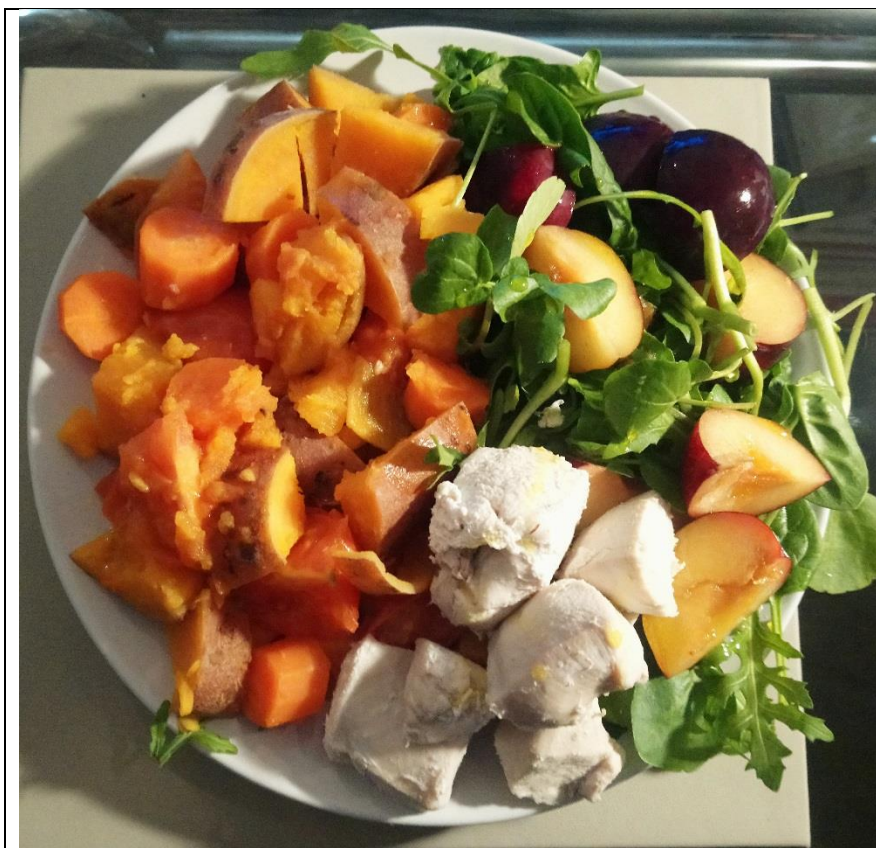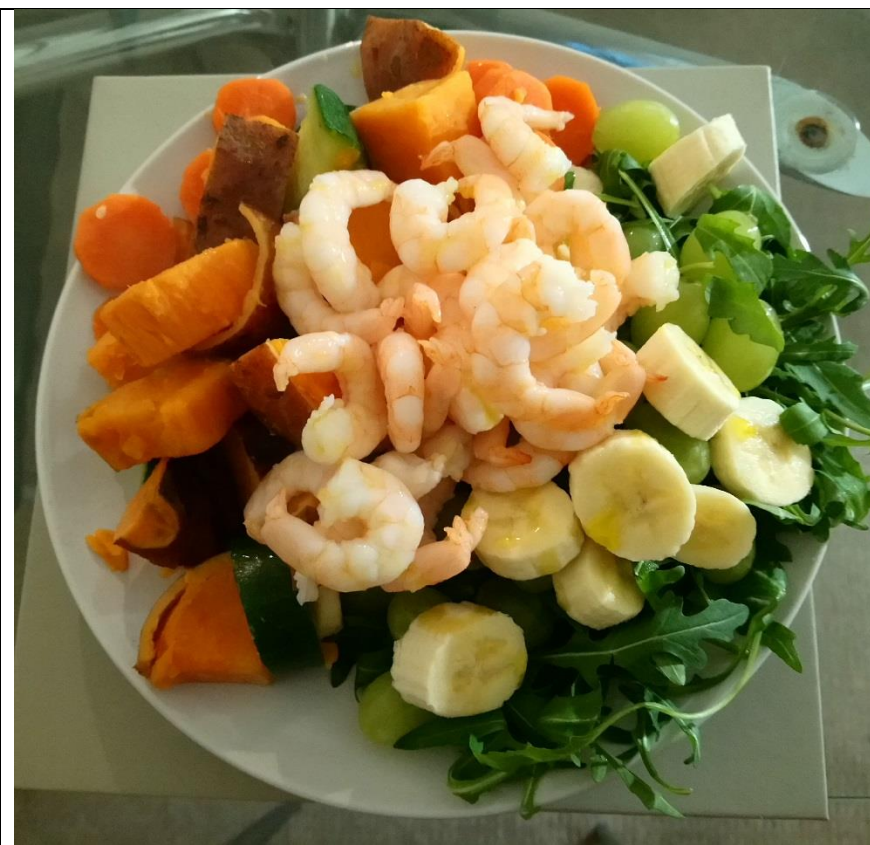

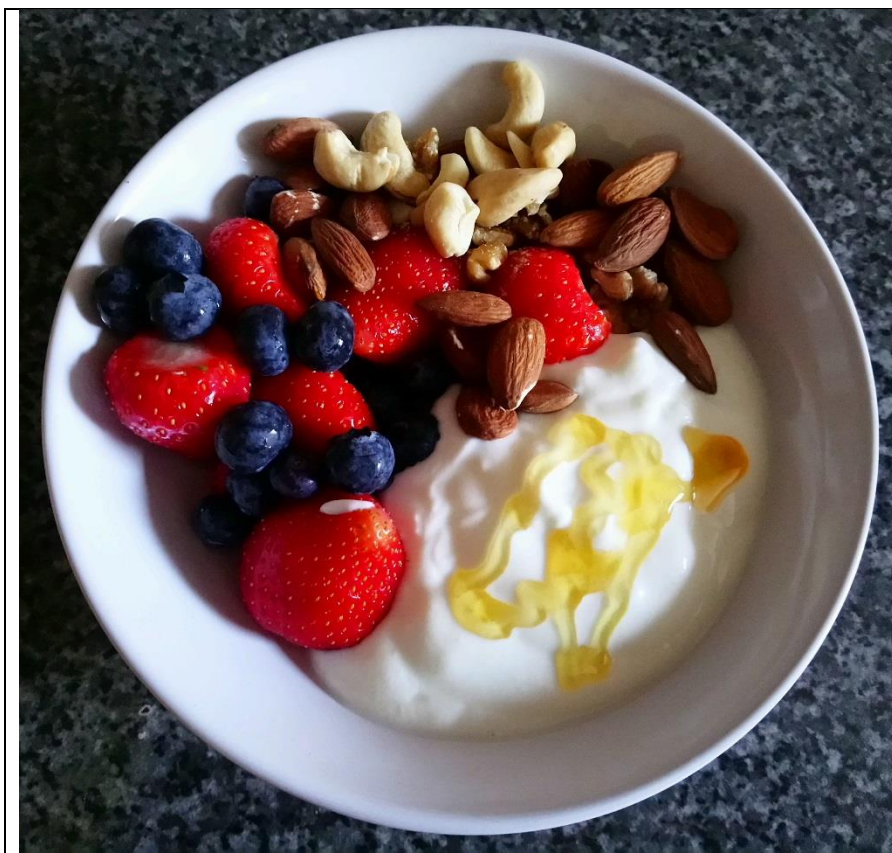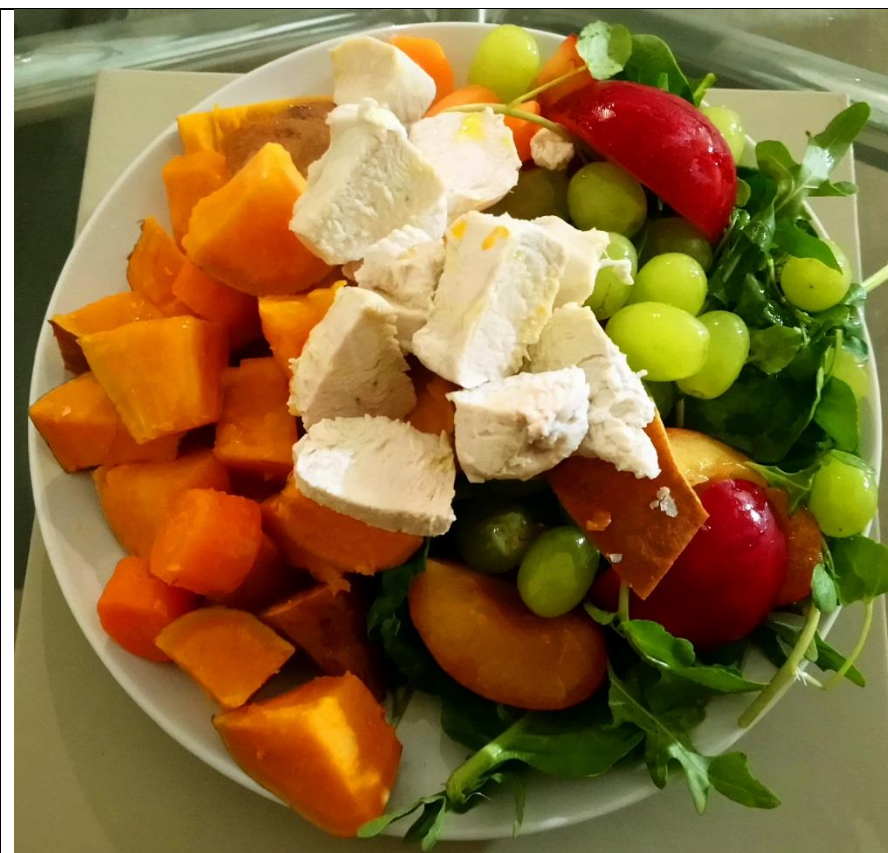



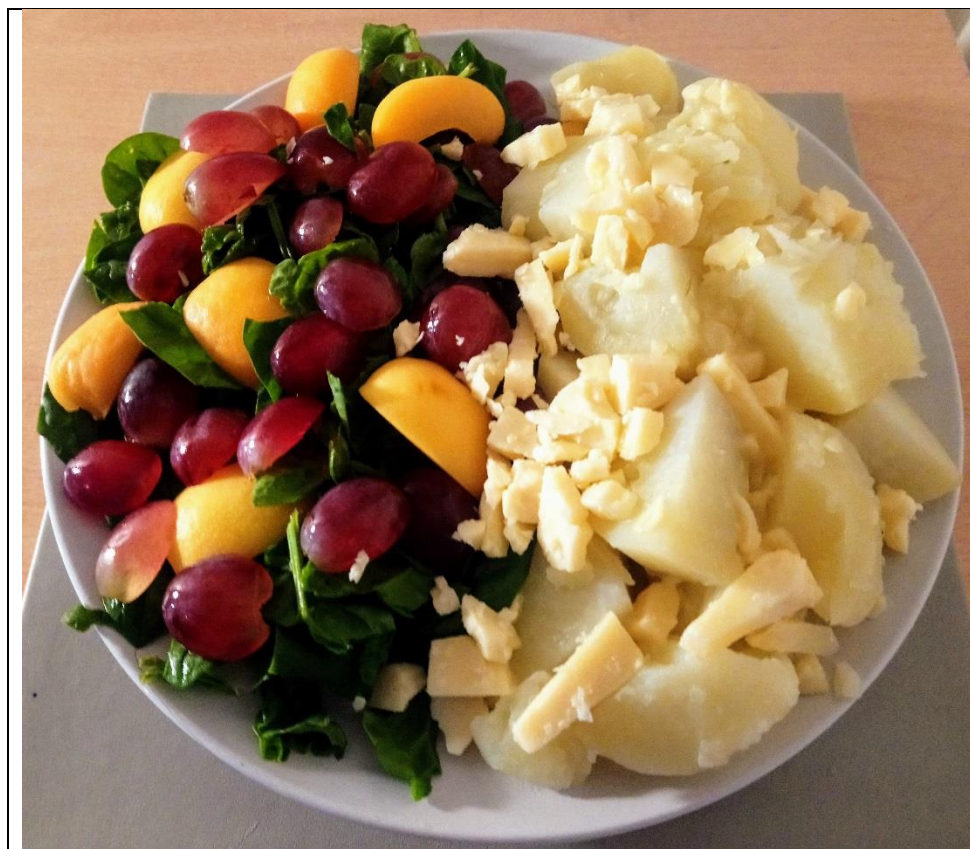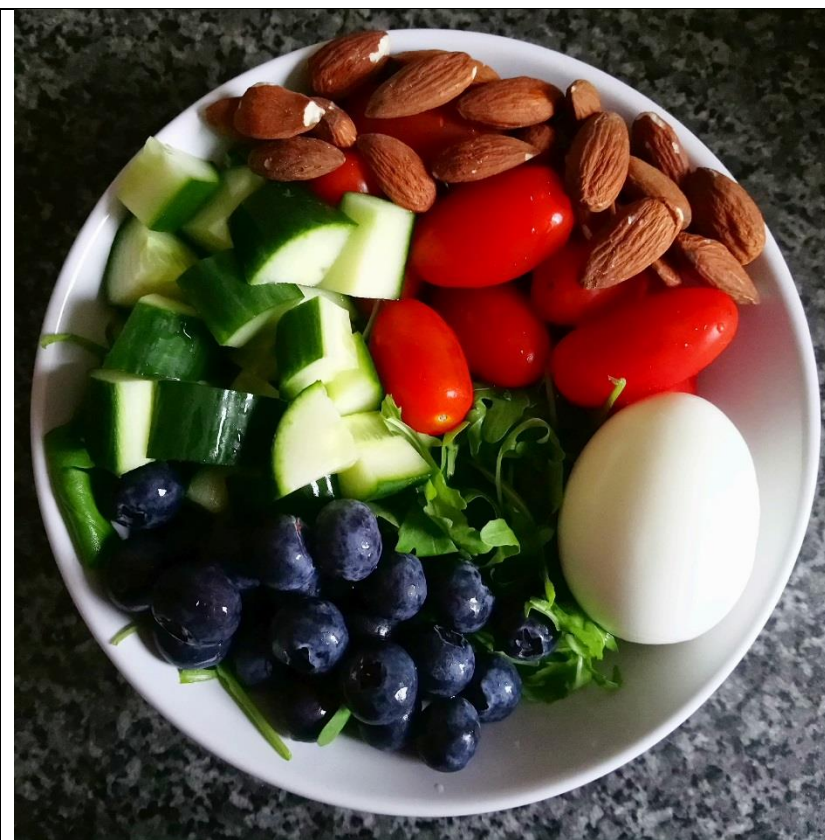

Supplement: s1 [file s1]
